# Supplementary material
Source: bioRxiv or medRxiv preprint supplement (https://medrxiv.org/highwire/filestream/78845/field_highwire_adjunct_files/0/2020.04.28.20083451-1.pdf)
Supplement: Supplementary file [file 2020.04.28.20083451-1.pdf]

**Table S1 - Subject Descriptive Data**

| label                            | levels       | A           | B            | C            | p     |
|----------------------------------|--------------|-------------|--------------|--------------|-------|
| Group                            | ARDS         | 9 (45.0)    | 4 (100.0)    | 5 (71.4)     | 0.087 |
|                                  | Control      | 11 (55.0)   |              | 2 (28.6)     |       |
| Age                              | Median (IQR) | 3.4 (7.6)   | 9.1 (4.6)    | 5.1 (1.1)    | 0.420 |
| Sex                              | Female       | 8 (40.0)    | 2 (50.0)     | 3 (42.9)     | 1.000 |
|                                  | Male         | 12 (60.0)   | 2 (50.0)     | 4 (57.1)     |       |
| Race                             | Non-White    | 1 (5.0)     | 2 (50.0)     | 1 (14.3)     | 0.062 |
|                                  | White        | 19 (95.0)   | 2 (50.0)     | 6 (85.7)     |       |
| Genetic Synd. or D.D.            | No           | 12 (60.0)   | 2 (50.0)     | 4 (57.1)     | 1.000 |
|                                  | Yes          | 8 (40.0)    | 2 (50.0)     | 3 (42.9)     |       |
| Baseline Lung Disease            | No           | 11 (55.0)   | 2 (50.0)     | 6 (85.7)     | 0.413 |
|                                  | Yes          | 9 (45.0)    | 2 (50.0)     | 1 (14.3)     |       |
| Baseline Kidney or Liver Disease | No           | 18 (90.0)   | 4 (100.0)    | 6 (85.7)     | 1.000 |
|                                  | Yes          | 2 (10.0)    |              | 1 (14.3)     |       |
| Immunocompromised                | No           | 16 (80.0)   | 2 (50.0)     | 5 (71.4)     | 0.426 |
|                                  | Yes          | 4 (20.0)    | 2 (50.0)     | 2 (28.6)     |       |
| Highest PELOD2                   | Median (IQR) | 5.0 (1.0)   | 8.5 (1.2)    | 7.0 (6.0)    | 0.031 |
| Highest PARDS Category           | None         | 10 (50.0)   |              | 2 (28.6)     | 0.129 |
|                                  | Mild         | 4 (20.0)    |              |              |       |
|                                  | Moderate     | 4 (20.0)    | 3 (75.0)     | 3 (42.9)     |       |
|                                  | Severe       | 2 (10.0)    | 1 (25.0)     | 2 (28.6)     |       |
| Any Corticosteroids              | No           | 12 (60.0)   | 2 (50.0)     | 2 (28.6)     | 0.382 |
|                                  | Yes          | 8 (40.0)    | 2 (50.0)     | 5 (71.4)     |       |
| Ventilator Free Days             | Median (IQR) | 16.4 (22.6) | 6.5 (13.5)   | 16.8 (22.8)  | 0.410 |
| PICU Days                        | Median (IQR) | 12.5 (13.2) | 21.5 (24.0)  | 16.0 (49.0)  | 0.302 |
| Hospital Days                    | Median (IQR) | 19.0 (19.0) | 71.0 (101.5) | 38.0 (111.5) | 0.070 |
| Mortality                        | Died         | 1 (5.0)     | 1 (25.0)     | 2 (28.6)     | 0.152 |
|                                  | Survived     | 19 (95.0)   | 3 (75.0)     | 5 (71.4)     |       |

**Table S2 - Specimen Descriptive Data**

| label                              | levels       | A         | B         | C         | p      |
|------------------------------------|--------------|-----------|-----------|-----------|--------|
| PELOD2                             | Median (IQR) | 5.0 (3.0) | 5.5 (1.8) | 6.0 (4.2) | 0.154  |
| PARDS Classification               | None         | 30 (55.6) |           | 3 (25.0)  | <0.001 |
|                                    | Mild         | 13 (24.1) | 2 (33.3)  |           |        |
|                                    | Moderate     | 7 (13.0)  | 2 (33.3)  | 8 (66.7)  |        |
|                                    | Severe       | 4 (7.4)   | 2 (33.3)  | 1 (8.3)   |        |
| Direct Lung Injury                 | No           | 36 (66.7) | 1 (16.7)  | 6 (50.0)  | 0.044  |
|                                    | Yes          | 18 (33.3) | 5 (83.3)  | 6 (50.0)  |        |
| Viral Infection                    | No           | 42 (77.8) | 2 (33.3)  | 4 (33.3)  | 0.002  |
|                                    | Yes          | 12 (22.2) | 4 (66.7)  | 8 (66.7)  |        |
| Bacterial Infection                | No           | 40 (74.1) | 4 (66.7)  | 6 (50.0)  | 0.252  |
|                                    | Yes          | 14 (25.9) | 2 (33.3)  | 6 (50.0)  |        |
| Combined Viral/Bacterial Infection | No           | 49 (90.7) | 4 (66.7)  | 7 (58.3)  | 0.014  |
|                                    | Yes          | 5 (9.3)   | 2 (33.3)  | 5 (41.7)  |        |
| Corticosteroids                    | No           | 32 (59.3) | 3 (50.0)  | 4 (33.3)  | 0.240  |
|                                    | Yes          | 22 (40.7) | 3 (50.0)  | 8 (66.7)  |        |

**Table S3 - Subject Univariate Analysis**

| Factor                           |              | A           | B or C      | p     |
|----------------------------------|--------------|-------------|-------------|-------|
| Group                            | ARDS         | 9 (45.0)    | 9 (81.8)    | 0.066 |
|                                  | Control      | 11 (55.0)   | 2 (18.2)    |       |
| Age                              | Mean (SD)    | 5.6 (5.2)   | 7.1 (4.6)   | 0.407 |
| Sex                              | Female       | 8 (40.0)    | 5 (45.5)    | 1.000 |
|                                  | Male         | 12 (60.0)   | 6 (54.5)    |       |
| Race                             | Non-White    | 1 (5.0)     | 3 (27.3)    | 0.115 |
|                                  | White        | 19 (95.0)   | 8 (72.7)    |       |
| Genetic Synd. or D.D.            | No           | 12 (60.0)   | 6 (54.5)    | 1.000 |
|                                  | Yes          | 8 (40.0)    | 5 (45.5)    |       |
| Baseline Lung Disease            | No           | 11 (55.0)   | 8 (72.7)    | 0.452 |
|                                  | Yes          | 9 (45.0)    | 3 (27.3)    |       |
| Baseline Kidney or Liver Disease | No           | 18 (90.0)   | 10 (90.9)   | 1.000 |
|                                  | Yes          | 2 (10.0)    | 1 (9.1)     |       |
| Immunocompromised                | No           | 16 (80.0)   | 7 (63.6)    | 0.405 |
|                                  | Yes          | 4 (20.0)    | 4 (36.4)    |       |
| Highest PELOD2                   | Median (IQR) | 5.0 (1.0)   | 8.0 (3.5)   | 0.013 |
| Highest PARDS Category           | None         | 10 (50.0)   | 2 (18.2)    | 0.043 |
|                                  | Mild         | 4 (20.0)    |             |       |
|                                  | Moderate     | 4 (20.0)    | 6 (54.5)    |       |
|                                  | Severe       | 2 (10.0)    | 3 (27.3)    |       |
| Any Corticosteroids              | No           | 12 (60.0)   | 4 (36.4)    | 0.273 |
|                                  | Yes          | 8 (40.0)    | 7 (63.6)    |       |
| Ventilator Free Days             | Median (IQR) | 16.4 (22.6) | 13.0 (20.3) | 0.614 |
| PICU Days                        | Median (IQR) | 12.5 (13.2) | 18.0 (44.5) | 0.172 |
| Hospital Days                    | Mean (SD)    | 34.2 (46.3) | 82.5 (70.8) | 0.029 |
| Mortality                        | Died         | 1 (5.0)     | 3 (27.3)    | 0.115 |
|                                  | Survived     | 19 (95.0)   | 8 (72.7)    |       |

**Table S4 - Specimen Univariate Analysis**

| Factor                             |              | A         | B or C    | p     |
|------------------------------------|--------------|-----------|-----------|-------|
| PELOD2                             | Median (IQR) | 5.0 (3.0) | 5.5 (3.0) | 0.056 |
| PARDS Classification               | None         | 30 (55.6) | 3 (16.7)  | 0.001 |
|                                    | Mild         | 13 (24.1) | 2 (11.1)  |       |
|                                    | Moderate     | 7 (13.0)  | 10 (55.6) |       |
|                                    | Severe       | 4 (7.4)   | 3 (16.7)  |       |
| Direct Lung Injury                 | No           | 36 (66.7) | 7 (38.9)  | 0.053 |
|                                    | Yes          | 18 (33.3) | 11 (61.1) |       |
| Viral Infection                    | No           | 42 (77.8) | 6 (33.3)  | 0.001 |
|                                    | Yes          | 12 (22.2) | 12 (66.7) |       |
| Bacterial Infection                | No           | 40 (74.1) | 10 (55.6) | 0.153 |
|                                    | Yes          | 14 (25.9) | 8 (44.4)  |       |
| Combined Viral/Bacterial Infection | No           | 49 (90.7) | 11 (61.1) | 0.008 |
|                                    | Yes          | 5 (9.3)   | 7 (38.9)  |       |
|                                    |              |           |           |       |
| Corticosteroids                    | No           | 32 (59.3) | 7 (38.9)  | 0.175 |
|                                    | Yes          | 22 (40.7) | 11 (61.1) |       |

**Table S5 - Subject Multivariate Analysis**

| Factor                |           | A           | B or C      | OR (univariable)           | OR (multivariable)        |
|-----------------------|-----------|-------------|-------------|----------------------------|---------------------------|
| Highest PELOD2        | Mean (SD) | 6.0 (1.8)   | 8.2 (2.8)   | 1.54 (1.09-2.40, p=0.026)  | 1.40 (0.97-2.20, p=0.092) |
| PARDS Moderate/Severe | No        | 14 (73.7)   | 5 (26.3)    | -                          | -                         |
|                       | Yes       | 6 (50.0)    | 6 (50.0)    | 2.80 (0.62-13.64, p=0.186) | 1.15 (0.15-7.30, p=0.884) |
| Hospital Days         | Mean (SD) | 34.2 (46.3) | 82.5 (70.8) | 1.01 (1.00-1.03, p=0.046)  | 1.01 (0.99-1.03, p=0.262) |

**Table S6 - Specimen Multivariate Analysis**

| Factor                |           | A         | B or C    | OR (univariable)            | OR (multivariable)         |
|-----------------------|-----------|-----------|-----------|-----------------------------|----------------------------|
| PELOD2                | Mean (SD) | 4.8 (2.7) | 6.4 (3.0) | 1.23 (1.01-1.53, p=0.046)   | 0.99 (0.76-1.29, p=0.912)  |
| PARDS Moderate/Severe | No        | 43 (89.6) | 5 (10.4)  | -                           | -                          |
|                       | Yes       | 11 (45.8) | 13 (54.2) | 10.16 (3.15-37.76, p<0.001) | 8.21 (2.01-40.28, p=0.005) |
| Direct Lung Injury    | No        | 36 (83.7) | 7 (16.3)  | -                           | -                          |
|                       | Yes       | 18 (62.1) | 11 (37.9) | 3.14 (1.06-9.88, p=0.042)   | 0.71 (0.11-3.62, p=0.696)  |
| Viral Infection       | No        | 42 (87.5) | 6 (12.5)  | -                           | -                          |
|                       | Yes       | 12 (50.0) | 12 (50.0) | 7.00 (2.25-24.05, p=0.001)  | 6.18 (1.21-41.17, p=0.038) |
